# Supplementary material
Source: PubMed Central journal article supplement (PMC2947136)
Supplement: 10.3163.1536-5050.98.4.005.sg001.pdf [file 10.3163.1536-5050.98.4.005.sg001.pdf]

**Mapping the literature of health education: 2006–2008**

**Amber T. Burtis, MLIS; Mary K. Taylor, RN, MLIS, AHIP**

**Table 6**  
Distribution and indexing coverage in 2008 of cited journals in Zones 1 and 2

| Cited journal [category]                                                           | No. of citations | CINAHL Plus with Full Text | EMBASE | ERIC | MEDLINE | PsycINFO | Science Citation Index Expanded | Scopus | Social Sciences Citation Index |
|------------------------------------------------------------------------------------|------------------|----------------------------|--------|------|---------|----------|---------------------------------|--------|--------------------------------|
| <b>Zone 1</b>                                                                      |                  |                            |        |      |         |          |                                 |        |                                |
| 1. J Am Coll Health [H]                                                            | 483              | 5                          | 0      | 5    | 5       | 2        | 0                               | 5      | 5                              |
| 2. Am J Public Health [PH]                                                         | 440              | 4                          | 4      | 0    | 5       | 2        | 5                               | 4      | 5                              |
| 3. JAMA [M]                                                                        | 429              | 3                          | 4      | 0    | 4       | 1        | 5                               | 4      | 1                              |
| 4. J Sch Health [H]                                                                | 404              | 5                          | 0      | 3    | 4       | 0        | 4                               | 4      | 4                              |
| 5. Health Educ Behav (formerly, Health Educ Q, preceded by Health Educ Monogr) [H] | 321              | 4                          | 0      | 2    | 5       | 4        | 0                               | 4      | 3                              |
| 6. Prev Med [M]                                                                    | 294              | 5                          | 5      | 0    | 5       | 2        | 5                               | 5      | 3                              |
| 7. Pediatrics [M]                                                                  | 275              | 4                          | 4      | 0    | 4       | 1        | 5                               | 4      | 1                              |
| 8. J Adolesc Health (formerly, J Adolesc Health Care)* [M]                         | 248              | 3                          | 3      | 0    | 3       | 3        | 5                               | 3      | 5                              |
| 9. Am J Prev Med* [M]                                                              | 235              | 4                          | 5      | 0    | 5       | 2        | 5                               | 5      | 3                              |
| 10. J Stud Alcohol Drugs (formerly, J Stud Alcohol)* [P]                           | 215              | 5                          | 5      | 0    | 5       | 5        | 5                               | 5      | 5                              |
| 11. MMWR Morb Mortal Wkly Rep* [PH]                                                | 185              | 5                          | 0      | 0    | 3       | 0        | 0                               | 4      | 0                              |

| Cited journal [category]                                                                                | No. of citations | CINAHL Plus with Full Text | EMBASE | ERIC | MEDLINE | PsycINFO | Science Citation Index Expanded | Scopus | Social Sciences Citation Index |
|---------------------------------------------------------------------------------------------------------|------------------|----------------------------|--------|------|---------|----------|---------------------------------|--------|--------------------------------|
| 12. Arch Pediatr Adolesc Med* [M]                                                                       | 183              | 4                          | 5      | 0    | 4       | 0        | 5                               | 5      | 2                              |
| 13. J Am Diet Assoc [N]                                                                                 | 181              | 5                          | 0      | 0    | 4       | 0        | 5                               | 4      | 1                              |
| 14. Med Sci Sports Exerc (formerly, Med Sci Sports)* [M]                                                | 173              | 5                          | 4      | 0    | 4       | 0        | 5                               | 5      | 1                              |
| 15. J Consult Clin Psychol (formerly, J Consult Psychol) [P]                                            | 155              | 0                          | 5      | 5    | 5       | 5        | 0                               | 5      | 5                              |
| 16. Addict Behav* [P]                                                                                   | 144              | 5                          | 5      | 0    | 5       | 5        | 5                               | 5      | 5                              |
| 17. Health Psychol* [P]                                                                                 | 141              | 5                          | 5      | 0    | 5       | 5        | 5                               | 5      | 5                              |
| 18. Health Educ Res* [H]                                                                                | 140              | 5                          | 5      | 0    | 5       | 5        | 0                               | 5      | 5                              |
| 19. Am J Health Educ (formerly, J Health Educ, preceded by Health Educ, preceded by Sch Health Rev) [H] | 135              | 5                          | 0      | 3    | 0       | 0        | 0                               | 4      | 0                              |
| 20. Am J Health Promot [H]                                                                              | 116              | 5                          | 5      | 0    | 3       | 3        | 0                               | 5      | 4                              |
| Zone 1 total indexing coverage score                                                                    |                  | 86                         | 64     | 18   | 83      | 45       | 64                              | 90     | 63                             |
| Zone 1 average indexing coverage score                                                                  |                  | 4.30                       | 3.20   | 0.90 | 4.15    | 2.25     | 3.20                            | 4.50   | 3.15                           |
| <b>Zone 2</b>                                                                                           |                  |                            |        |      |         |          |                                 |        |                                |
| 21. Am J Clin Nutr (formerly, J Clin Nutr)                                                              | 102              | 4                          | 5      | 0    | 4       | 0        | 5                               | 5      | 0                              |
| 22. Addiction                                                                                           | 98               | 5                          | 4      | 0    | 4       | 5        | 5                               | 5      | 5                              |
| 23. Int J Obes (Lond) (formerly, Int J Obes Relat Metab Disord, preceded by Int J Obes)                 | 97               | 2                          | 2      | 0    | 1       | 0        | 5                               | 2      | 1                              |

| Cited journal [category]                                                      | No. of citations | CINAHL Plus with Full Text | EMBASE | ERIC | MEDLINE | PsycINFO | Science Citation Index Expanded | Scopus | Social Sciences Citation Index |
|-------------------------------------------------------------------------------|------------------|----------------------------|--------|------|---------|----------|---------------------------------|--------|--------------------------------|
| 24. N Engl J Med†                                                             | 96               | 3                          | 4      | 0    | 4       | 1        | 4                               | 5      | 1                              |
| 25. Soc Sci Med                                                               | 95               | 5                          | 5      | 0    | 5       | 3        | 0                               | 5      | 5                              |
| 26. Am J Epidemiol                                                            | 91               | 2                          | 2      | 0    | 2       | 0        | 5                               | 2      | 1                              |
| 27. Obesity (Silver Spring) (formerly, Obes Res)                              | 91               | 2                          | 0      | 0    | 2       | 1        | 5                               | 2      | 1                              |
| 28. Am J Health Behav (formerly, Health Values)                               | 84               | 5                          | 0      | 2    | 5       | 5        | 0                               | 5      | 5                              |
| 29. J Pers Soc Psychol                                                        | 83               | 0                          | 0      | 0    | 5       | 5        | 0                               | 5      | 5                              |
| 30. Int J Eat Disord                                                          | 72               | 5                          | 5      | 0    | 5       | 5        | 5                               | 5      | 5                              |
| 31. Perspect Sex Reprod Health (formerly, Fam Plann Perspect)†                | 71               | 5                          | 0      | 0    | 3       | 1        | 0                               | 4      | 4                              |
| 32. Res Q Exerc Sport (formerly, Res Q)                                       | 71               | 1                          | 0      | 1    | 1       | 0        | 5                               | 1      | 5                              |
| 33. J Am Acad Child Adolesc Psychiatry (formerly, J Am Acad Child Psychiatry) | 66               | 3                          | 4      | 3    | 3       | 5        | 5                               | 4      | 5                              |
| 34. Public Health Rept†                                                       | 66               | 4                          | 5      | 0    | 4       | 0        | 5                               | 5      | 5                              |
| 35. Am Psychol                                                                | 65               | 0                          | 0      | 2    | 3       | 5        | 0                               | 3      | 3                              |
| 36. Psychol Addict Behav (formerly, Bull Soc Psychol Addict Behav)            | 65               | 5                          | 5      | 0    | 5       | 5        | 0                               | 5      | 5                              |
| 37. Ann Behav Med                                                             | 63               | 1                          | 1      | 0    | 1       | 1        | 0                               | 1      | 5                              |
| 38. MMWR Surveill Summ                                                        | 63               | 0                          | 0      | 0    | 5       | 0        | 0                               | 0      | 0                              |
| 39. BMJ (formerly, Brit Med J)                                                | 61               | 4                          | 2      | 0    | 4       | 1        | 5                               | 3      | 1                              |
| 40. Diabetes Care                                                             | 57               | 4                          | 4      | 0    | 4       | 0        | 4                               | 5      | 1                              |
| 41. Annu Rev Public Health                                                    | 56               | 0                          | 5      | 0    | 5       | 2        | 5                               | 5      | 5                              |

| Cited journal [category]                                     | No. of citations | CINAHL Plus with Full Text | EMBASE | ERIC | MEDLINE | PsycINFO | Science Citation Index Expanded | Scopus | Social Sciences Citation Index |
|--------------------------------------------------------------|------------------|----------------------------|--------|------|---------|----------|---------------------------------|--------|--------------------------------|
| 42. J Nutr Educ Behav (formerly, J Nutr Educ)                | 56               | 5                          | 0      | 2    | 4       | 2        | 4                               | 4      | 2                              |
| 43. J Pediatr                                                | 56               | 3                          | 4      | 0    | 3       | 1        | 4                               | 5      | 1                              |
| 44. J Coll Stud Dev (formerly, J Coll Stud Pers)             | 54               | 0                          | 0      | 3    | 0       | 2        | 0                               | 3      | 5                              |
| 45. Patient Educ Couns (formerly, Patient Couns Health Educ) | 53               | 5                          | 5      | 0    | 5       | 5        | 5                               | 5      | 5                              |
| 46. J Community Psychol (formerly, J Clin Psychol)           | 52               | 0                          | 0      | 0    | 0       | 5        | 0                               | 5      | 5                              |
| 47. Psychol Bull                                             | 51               | 0                          | 0      | 5    | 4       | 5        | 5                               | 5      | 5                              |
| 48. J Appl Soc Psychol                                       | 50               | 0                          | 0      | 0    | 0       | 5        | 0                               | 5      | 5                              |
| 49. Am J Psychiatry                                          | 49               | 3                          | 4      | 0    | 3       | 5        | 5                               | 4      | 5                              |
| 50. Subst Use Misuse (formerly, Int J Addict)                | 49               | 0                          | 4      | 0    | 4       | 4        | 4                               | 5      | 4                              |
| 51. Tob Control                                              | 49               | 3                          | 0      | 0    | 3       | 1        | 5                               | 5      | 5                              |
| 52. Adolescence                                              | 48               | 4                          | 0      | 3    | 3       | 4        | 0                               | 3      | 5                              |
| 53. Cancer                                                   | 48               | 0                          | 4      | 0    | 5       | 0        | 4                               | 5      | 1                              |
| 54. Ethn Dis                                                 | 48               | 4                          | 4      | 0    | 4       | 0        | 1                               | 5      | 1                              |
| 55. Lancet                                                   | 48               | 4                          | 4      | 0    | 4       | 1        | 5                               | 5      | 1                              |
| 56. Alcohol Clin Exp Res                                     | 47               | 1                          | 1      | 0    | 1       | 1        | 5                               | 1      | 1                              |
| 57. Health Promot Int (formerly, Health Promot)              | 47               | 5                          | 5      | 0    | 5       | 2        | 0                               | 5      | 5                              |
| 58. J Drug Educ                                              | 47               | 5                          | 3      | 3    | 5       | 5        | 0                               | 5      | 5                              |
| 59. J Behav Med                                              | 45               | 5                          | 5      | 0    | 5       | 5        | 0                               | 5      | 5                              |
| 60. Health Promot Pract                                      | 43               | 5                          | 0      | 0    | 5       | 2        | 0                               | 0      | 0                              |
| 61. Psychol Rep                                              | 43               | 0                          | 0      | 0    | 5       | 5        | 0                               | 5      | 5                              |

| Cited journal [category]                              | No. of citations | CINAHL Plus with Full Text | EMBASE | ERIC | MEDLINE | PsycINFO | Science Citation Index Expanded | Scopus | Social Sciences Citation Index |
|-------------------------------------------------------|------------------|----------------------------|--------|------|---------|----------|---------------------------------|--------|--------------------------------|
| 62. Sex Transm Dis (formerly, J Am Ven Dis Assoc)     | 42               | 5                          | 4      | 0    | 5       | 0        | 5                               | 5      | 2                              |
| 63. Pediatr Exerc Sci                                 | 41               | 5                          | 5      | 0    | 4       | 0        | 4                               | 5      | 2                              |
| 64. J Asthma (formerly, J Asthma Res)                 | 40               | 0                          | 5      | 0    | 4       | 1        | 5                               | 5      | 1                              |
| 65. Science                                           | 40               | 0                          | 4      | 0    | 4       | 1        | 5                               | 5      | 1                              |
| 66. J Abnorm Psychol (formerly, J Abnorm Soc Psychol) | 39               | 5                          | 5      | 0    | 5       | 5        | 0                               | 5      | 5                              |
| 67. Arch Intern Med                                   | 38               | 4                          | 5      | 0    | 4       | 0        | 5                               | 5      | 1                              |
| 68. J Health Soc Behav (formerly, J Health Hum Behav) | 38               | 0                          | 0      | 0    | 5       | 4        | 0                               | 5      | 5                              |
| 69. MMWR Recomm Rep                                   | 38               | 0                          | 0      | 0    | 5       | 0        | 0                               | 0      | 0                              |
| 70. Am J Community Psychol                            | 37               | 0                          | 0      | 0    | 5       | 5        | 0                               | 5      | 5                              |
| 71. Child Dev                                         | 36               | 5                          | 0      | 4    | 5       | 5        | 0                               | 5      | 5                              |
| 72. J Natl Cancer Inst                                | 35               | 0                          | 4      | 0    | 4       | 0        | 5                               | 5      | 1                              |
| 73. Arch Gen Psychiatry                               | 34               | 0                          | 5      | 0    | 4       | 5        | 5                               | 5      | 5                              |
| 74. Public Health Nutr                                | 34               | 3                          | 5      | 0    | 4       | 0        | 5                               | 5      | 1                              |
| 75. Cancer Epidemiol Biomarkers Prev                  | 33               | 0                          | 5      | 0    | 5       | 0        | 5                               | 5      | 1                              |
| 76. Chest                                             | 33               | 4                          | 5      | 0    | 4       | 0        | 5                               | 5      | 1                              |
| 77. Environ Health Perspect                           | 33               | 5                          | 3      | 0    | 4       | 0        | 5                               | 4      | 1                              |
| 78. J Youth Adolesc                                   | 33               | 5                          | 0      | 0    | 1       | 5        | 0                               | 4      | 5                              |
| 79. J Alcohol Drug Educ (formerly, J Alcohol Educ)    | 32               | 5                          | 0      | 3    | 1       | 2        | 0                               | 4      | 0                              |
| 80. J Clin Oncol                                      | 32               | 4                          | 5      | 0    | 4       | 0        | 5                               | 5      | 1                              |
| 81. J Health Commun                                   | 32               | 4                          | 4      | 0    | 4       | 2        | 0                               | 4      | 5                              |

| Cited journal [category]                                                | No. of citations | CINAHL Plus with Full Text | EMBASE | ERIC | MEDLINE | PsycINFO | Science Citation Index Expanded | Scopus | Social Sciences Citation Index |
|-------------------------------------------------------------------------|------------------|----------------------------|--------|------|---------|----------|---------------------------------|--------|--------------------------------|
| 82. J Couns Psychol                                                     | 31               | 0                          | 0      | 5    | 0       | 5        | 0                               | 5      | 5                              |
| 83. J Gen Intern Med                                                    | 31               | 0                          | 2      | 0    | 2       | 1        | 5                               | 2      | 1                              |
| 84. J Interpers Violence                                                | 31               | 5                          | 0      | 4    | 5       | 5        | 0                               | 5      | 5                              |
| 85. Suicide Life Threat Behav (formerly, Suicide)                       | 31               | 5                          | 2      | 4    | 5       | 5        | 0                               | 5      | 5                              |
| 86. Clin Psychol Rev                                                    | 30               | 0                          | 4      | 0    | 4       | 5        | 0                               | 5      | 5                              |
| 87. Can J Public Health                                                 | 29               | 5                          | 0      | 0    | 4       | 0        | 0                               | 5      | 0                              |
| 88. J Sch Nurs                                                          | 29               | 5                          | 0      | 1    | 4       | 4        | 0                               | 0      | 0                              |
| 89. Psychol Health                                                      | 29               | 1                          | 0      | 0    | 0       | 1        | 0                               | 1      | 5                              |
| 90. J Community Health                                                  | 28               | 5                          | 4      | 0    | 4       | 3        | 0                               | 4      | 5                              |
| 91. J Allergy Clin Immunol (formerly, J Allergy)                        | 27               | 0                          | 2      | 0    | 2       | 0        | 5                               | 2      | 0                              |
| 92. J Psychosom Res                                                     | 27               | 2                          | 3      | 0    | 2       | 3        | 5                               | 3      | 5                              |
| 93. Oncol Nurs Forum                                                    | 27               | 5                          | 0      | 0    | 1       | 1        | 5                               | 2      | 5                              |
| 94. Prev Sci                                                            | 27               | 5                          | 0      | 0    | 5       | 5        | 0                               | 5      | 5                              |
| 95. Public Opin Q                                                       | 27               | 0                          | 0      | 0    | 0       | 2        | 0                               | 4      | 5                              |
| 96. Am J Health Stud (formerly, J Wellness Perspect; Wellness Perspect) | 26               | 0                          | 0      | 0    | 0       | 0        | 0                               | 0      | 0                              |
| 97. Appetite                                                            | 26               | 4                          | 5      | 0    | 5       | 5        | 5                               | 5      | 3                              |
| 98. CA Cancer J Clin                                                    | 26               | 4                          | 5      | 0    | 3       | 0        | 5                               | 5      | 1                              |
| 99. Dev Psychol                                                         | 26               | 0                          | 0      | 5    | 5       | 5        | 0                               | 5      | 5                              |
| 100. Med Care                                                           | 26               | 5                          | 2      | 0    | 5       | 2        | 5                               | 5      | 5                              |
| 101. Psychol Med                                                        | 26               | 4                          | 4      | 0    | 4       | 4        | 5                               | 4      | 5                              |
| 102. AIDS Care                                                          | 25               | 4                          | 5      | 0    | 4       | 4        | 0                               | 5      | 0                              |
| 103. Ann Intern Med                                                     | 25               | 4                          | 4      | 0    | 4       | 0        | 5                               | 5      | 1                              |
| 104. Eval Rev (formerly, Eval Q)                                        | 25               | 0                          | 0      | 4    | 4       | 3        | 0                               | 5      | 1                              |

| <b>Cited journal [category]</b>                                          | <b>No. of citations</b> | <b>CINAHL Plus with Full Text</b> | <b>EMBASE</b> | <b>ERIC</b> | <b>MEDLINE</b> | <b>PsycINFO</b> | <b>Science Citation Index Expanded</b> | <b>Scopus</b> | <b>Social Sciences Citation Index</b> |
|--------------------------------------------------------------------------|-------------------------|-----------------------------------|---------------|-------------|----------------|-----------------|----------------------------------------|---------------|---------------------------------------|
| 105. J Clin Epidemiol (formerly, J Chronic Dis)                          | 25                      | 0                                 | 5             | 0           | 5              | 0               | 5                                      | 5             | 1                                     |
| 106. J Nutr                                                              | 25                      | 4                                 | 5             | 0           | 5              | 0               | 5                                      | 5             | 1                                     |
| 107. Percept Mot Skills                                                  | 25                      | 5                                 | 0             | 0           | 5              | 5               | 0                                      | 5             | 5                                     |
| 108. Drug Alcohol Depend                                                 | 24                      | 5                                 | 4             | 0           | 5              | 4               | 5                                      | 5             | 3                                     |
| 109. Psychol Women Q                                                     | 24                      | 4                                 | 0             | 3           | 0              | 5               | 0                                      | 3             | 5                                     |
| 110. Coll Stud J                                                         | 23                      | 0                                 | 0             | 4           | 0              | 5               | 0                                      | 0             | 0                                     |
| 111. J Adolesc                                                           | 23                      | 4                                 | 4             | 4           | 4              | 5               | 0                                      | 4             | 5                                     |
| 112. J Cancer Educ                                                       | 23                      | 5                                 | 5             | 0           | 4              | 3               | 4                                      | 5             | 2                                     |
| 113. J Pediatr Psychol                                                   | 23                      | 4                                 | 4             | 0           | 4              | 5               | 0                                      | 5             | 5                                     |
| 114. Prev Chronic Dis                                                    | 23                      | 0                                 | 0             | 0           | 5              | 0               | 0                                      | 0             | 0                                     |
| 115. Sports Med                                                          | 23                      | 5                                 | 5             | 0           | 5              | 1               | 5                                      | 5             | 1                                     |
| 116. Health Aff (Millwood)                                               | 22                      | 5                                 | 4             | 0           | 4              | 0               | 5                                      | 4             | 5                                     |
| 117. J Sex Res                                                           | 22                      | 0                                 | 0             | 0           | 2              | 1               | 0                                      | 2             | 5                                     |
| 118. Nicotine Tob Res                                                    | 22                      | 5                                 | 5             | 0           | 5              | 5               | 5                                      | 5             | 5                                     |
| 119. AIDS Educ Prev                                                      | 21                      | 5                                 | 5             | 2           | 5              | 5               | 0                                      | 5             | 5                                     |
| 120. Fam Relat (formerly, Fam Coord)                                     | 21                      | 0                                 | 0             | 4           | 0              | 5               | 0                                      | 5             | 5                                     |
| 121. J Epidemiol Community Health (formerly, Epidemiol Community Health) | 21                      | 3                                 | 3             | 0           | 3              | 1               | 5                                      | 3             | 5                                     |
| 122. J Prim Prev (formerly, J Prev)                                      | 21                      | 5                                 | 5             | 2           | 5              | 5               | 0                                      | 5             | 0                                     |
| 123. J Subst Abuse (ceased 2001)                                         | 21                      | 0                                 | 3             | 0           | 5              | 3               | 3                                      | 3             | 3                                     |
| 124. J Gerontol A & B (formerly, J Gerontol)                             | 21                      | 4                                 | 5             | 0           | 5              | 2               | 0                                      | 5             | 5                                     |
| 125. Violence Vict                                                       | 21                      | 5                                 | 4             | 0           | 5              | 0               | 0                                      | 5             | 0                                     |
| 126. Arch Dis Child                                                      | 20                      | 3                                 | 4             | 0           | 3              | 0               | 3                                      | 5             | 1                                     |
| 127. Cyberpsychol Behav                                                  | 20                      | 0                                 | 5             | 0           | 5              | 5               | 0                                      | 5             | 5                                     |

| <b>Cited journal [category]</b>                              | <b>No. of citations</b> | <b>CINAHL Plus with Full Text</b> | <b>EMBASE</b> | <b>ERIC</b> | <b>MEDLINE</b> | <b>PsycINFO</b> | <b>Science Citation Index Expanded</b> | <b>Scopus</b> | <b>Social Sciences Citation Index</b> |
|--------------------------------------------------------------|-------------------------|-----------------------------------|---------------|-------------|----------------|-----------------|----------------------------------------|---------------|---------------------------------------|
| 128. Health Commun                                           | 20                      | 5                                 | 0             | 0           | 4              | 4               | 0                                      | 5             | 5                                     |
| 129. J Occup Environ Med (formerly, J Occup Med)             | 20                      | 5                                 | 4             | 0           | 4              | 2               | 4                                      | 4             | 2                                     |
| 130. J Sport Exerc Psychol (formerly, J Sport Psychol)       | 20                      | 3                                 | 0             | 0           | 3              | 5               | 3                                      | 3             | 3                                     |
| 131. J Natl Med Assoc                                        | 20                      | 4                                 | 4             | 0           | 4              | 1               | 4                                      | 5             | 1                                     |
| 132. Psychol Rev                                             | 20                      | 0                                 | 0             | 4           | 3              | 5               | 5                                      | 4             | 5                                     |
| 133. Public Health Nurs                                      | 20                      | 5                                 | 0             | 0           | 4              | 3               | 5                                      | 5             | 5                                     |
| 134. Res Nurs Health                                         | 20                      | 5                                 | 0             | 0           | 5              | 5               | 5                                      | 5             | 5                                     |
| 135. Ann Epidemiol                                           | 19                      | 5                                 | 5             | 0           | 5              | 0               | 5                                      | 5             | 2                                     |
| 136. Fam Community Health                                    | 19                      | 3                                 | 0             | 0           | 3              | 5               | 0                                      | 3             | 5                                     |
| 137. J Public Health Manag Pract                             | 19                      | 4                                 | 4             | 0           | 5              | 0               | 0                                      | 5             | 4                                     |
| 138. J Urban Health (formerly, Bull N Y Acad Med)            | 19                      | 4                                 | 4             | 0           | 4              | 0               | 0                                      | 5             | 0                                     |
| 139. Obstet Gynecol                                          | 19                      | 3                                 | 3             | 0           | 3              | 0               | 5                                      | 3             | 1                                     |
| 140. Women Health                                            | 19                      | 5                                 | 0             | 0           | 5              | 4               | 0                                      | 4             | 5                                     |
| 141. Alcohol Res Health (formerly, Alcohol Health Res World) | 18                      | 5                                 | 0             | 0           | 0              | 1               | 0                                      | 3             | 0                                     |
| 142. Am J Drug Alcohol Abuse                                 | 18                      | 5                                 | 5             | 0           | 5              | 5               | 0                                      | 5             | 5                                     |
| 143. Am J Orthopsychiatry                                    | 18                      | 5                                 | 3             | 0           | 5              | 5               | 5                                      | 5             | 5                                     |
| 144. Annu Rev Psychol                                        | 18                      | 5                                 | 0             | 0           | 5              | 5               | 5                                      | 5             | 5                                     |
| 145. Hisp J Behav Sci                                        | 18                      | 2                                 | 0             | 2           | 0              | 3               | 0                                      | 2             | 5                                     |
| 146. J Early Adolesc                                         | 18                      | 0                                 | 0             | 5           | 0              | 0               | 0                                      | 5             | 5                                     |



| Cited journal [category]                                                 | No. of citations | CINAHL Plus with Full Text | EMBASE | ERIC | MEDLINE | PsycINFO | Science Citation Index Expanded | Scopus | Social Sciences Citation Index |
|--------------------------------------------------------------------------|------------------|----------------------------|--------|------|---------|----------|---------------------------------|--------|--------------------------------|
| 147. J Womens Health (Larchmt) (formerly, J Womens Health Gen Based Med) | 18               | 5                          | 4      | 0    | 4       | 2        | 0                               | 4      | 0                              |
| 148. Natl Vital Stat Rep (formerly, Mon Vital Stat Rep)                  | 18               | 0                          | 0      | 0    | 5       | 0        | 0                               | 4      | 0                              |
| 149. Organ Behav Hum Decis Process (formerly, Organ Behav Hum Perform)   | 18               | 0                          | 0      | 1    | 0       | 5        | 0                               | 5      | 5                              |
| Zone 2 total indexing score                                              |                  | 378                        | 313    | 85   | 461     | 328      | 305                             | 528    | 404                            |
| Zone 2 average indexing coverage score                                   |                  | 2.93                       | 2.43   | 0.66 | 3.57    | 2.54     | 2.36                            | 4.09   | 3.13                           |
| <b>Overall indexing coverage score</b>                                   |                  | 464                        | 377    | 103  | 544     | 373      | 369                             | 618    | 467                            |
| <b>Overall average indexing coverage score</b>                           |                  | 3.11                       | 2.53   | 0.69 | 3.65    | 2.50     | 2.48                            | 4.15   | 3.13                           |

Indexing coverage scale: 5 (95%–100%); 4 (75%–94%); 3 (50%–74%); 2 (25%–49%); 1 (1%–24%); 0 (<1%).

Journal categories: [H]=health education; [M]=medical; [N]=nutrition; [P]=psychology; [PH]=public health.

\*=Journal is new to Zone 1 (since Schloman's study).

†=Journal dropped out of Zone 1 (since Schloman's study).
